# Supplementary material
Source: ML conference proceedings conference paper supplement (https://proceedings.mlr.press/v28/arora13.html)
Supplement: Supplementary file [file arora13-supp.pdf]

---

# Supplemental Material for “A Practical Algorithm for Topic Modeling with Provable Guarantees”

---

Sanjeev Arora  
Rong Ge  
Yoni Halpern  
David Mimno  
Ankur Moitra  
David Sontag  
Yichen Wu  
Michael Zhu

ARORA@CS.PRINCETON.EDU  
RONGGE@CS.PRINCETON.EDU  
HALPERN@CS.NYU.EDU  
MIMNO@CS.PRINCETON.EDU  
MOITRA@IAS.EDU  
DSONTAG@CS.NYU.EDU  
YICHENWU@PRINCETON.EDU  
MHZHU@PRINCETON.EDU

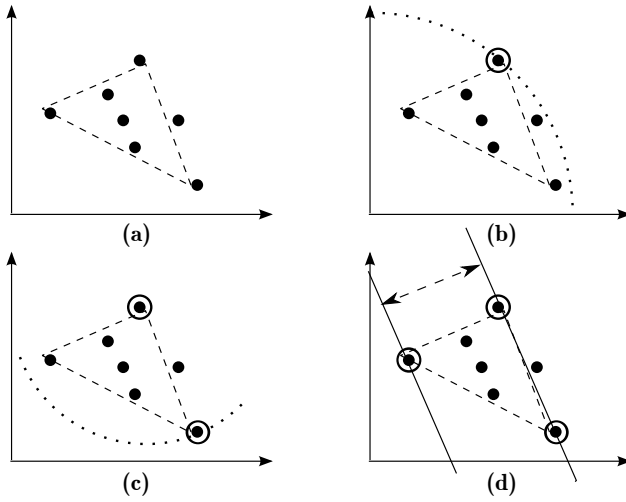

Figure 1. Illustration of the Algorithm

## 1. Proof for Anchor-Words Finding Algorithm

Recall that the correctness of the algorithm depends on the following Lemma:

**Lemma 1.1.** *The point  $d_j$  found by the algorithm must be  $\delta = O(\epsilon/\gamma^2)$  close to some vertex  $v_i$ . In particular, the corresponding  $a_j$   $O(\epsilon/\gamma^2)$ -covers  $v_i$ .*

In order to prove this Lemma, we first show that even if previously found vertices are only  $\delta$  close to some vertices, there is still another vertex that is far from the span of previously found vertices.

**Lemma 1.2.** *Suppose all previously found vertices are  $O(\epsilon/\gamma^2)$  close to distinct vertices, there is a vertex  $v_i$  whose distance from  $\text{span}(S)$  is at least  $\gamma/2$ .*

In order to prove Lemma 1.2, we use a volume argument. First we show that the volume of a robust simplex cannot change by too much when the vertices are perturbed.

**Lemma 1.3.** *Suppose  $\{v_1, v_2, \dots, v_K\}$  are the vertices of a  $\gamma$ -robust simplex  $S$ . Let  $S'$  be a simplex with vertices  $\{v'_1, v'_2, \dots, v'_K\}$ , each of the vertices  $v'_i$  is a perturbation of  $v_i$  and  $\|v'_i - v_i\|_2 \leq \delta$ . When  $10\sqrt{K}\delta < \gamma$  the volume of the two simplices satisfy*

$$\text{vol}(S)(1 - 2\delta/\gamma)^{K-1} \leq \text{vol}(S') \leq \text{vol}(S)(1 + 4\delta/\gamma)^{K-1}.$$

**Proof:** As the volume of a simplex is proportional to the determinant of a matrix whose columns are the edges of the simplex, we first show the following perturbation bound for determinant.

**Claim 1.4.** *Let  $A, E$  be  $K \times K$  matrices, the smallest eigenvalue of  $A$  is at least  $\gamma$ , the Frobenius norm  $\|E\|_F \leq \sqrt{K}\delta$ , when  $\gamma > 5\sqrt{K}\delta$  we have*

$$\det(A + E)/\det(A) \geq (1 - \delta/\gamma)^K.$$

**Proof:** Since  $\det(AB) = \det(A)\det(B)$ , we can multiply both  $A$  and  $A + E$  by  $A^{-1}$ . Hence  $\det(A + E)/\det(A) = \det(I + A^{-1}E)$ .

The Frobenius norm of  $A^{-1}E$  is bounded by

$$\|A^{-1}E\|_F \leq \|A^{-1}\|_2 \|E\|_F \leq \sqrt{K}\delta/\gamma.$$

Let the eigenvalues of  $A^{-1}E$  be  $\lambda_1, \lambda_2, \dots, \lambda_K$ , then by definition of Frobenius Norm  $\sum_{i=1}^K \lambda_i^2 \leq \|A^{-1}E\|_F^2 \leq K\delta^2/\gamma^2$ .

The eigenvalues of  $I + A^{-1}E$  are just  $1 + \lambda_1, 1 + \lambda_2, \dots, 1 + \lambda_K$ , and the determinant  $\det(I + A^{-1}E) = \prod_{i=1}^K (1 + \lambda_i)$ . Hence it suffices to show

$$\min \prod_{i=1}^K (1 + \lambda_i) \geq (1 - \delta/\gamma)^K \text{ when } \sum_{i=1}^K \lambda_i^2 \leq K\delta^2/\gamma^2.$$

To do this we apply Lagrangian method and show the minimum is only obtained when all  $\lambda_i$ 's are equal. The optimal value must be obtained at a local optimum of

$$\prod_{i=1}^K (1 + \lambda_i) + C \sum_{i=1}^K \lambda_i^2.$$

Taking partial derivatives with respect to  $\lambda_i$ 's, we get the equations  $-\lambda_i(1 + \lambda_i) = -\prod_{i=1}^K (1 + \lambda_i)/2C$  (here using  $\sqrt{K}\delta/\gamma$  is small so  $1 + \lambda_i > 1/2 > 0$ ). The right hand side is a constant, so each  $\lambda_i$  must be one of the two solutions of this equation. However, only one of the solution is larger than  $1/2$ , therefore all the  $\lambda_i$ 's are equal.

■

For the lower bound, we can project the perturbed subspace to the  $K - 1$  dimensional space. Such a projection cannot increase the volume and the perturbation distances only get smaller. Therefore we can apply the claim directly, the columns of  $A$  are just  $v_{i+1} - v_1$  for  $i = 1, 2, \dots, K - 1$ ; columns of  $E$  are just  $v'_{i+1} - v_{i+1} - (v'_1 - v_1)$ . The smallest eigenvalue of  $A$  is at least  $\gamma$  because the polytope is  $\gamma$  robust, which is equivalent to saying after orthogonalization each column still has length at least  $\gamma$ . The Frobenius norm of  $E$  is at most  $2\sqrt{K-1}\delta$ . We get the lower bound directly by applying the claim.

For the upper bound, swap the two sets  $S$  and  $S'$  and use the argument for the lower bound. The only thing we need to show is that the smallest eigenvalue of the matrix generated by points in  $S'$  is still at least  $\gamma/2$ . This follows from Wedin's Theorem (Wedin, 1972) and the fact that  $\|E\| \leq \|E\|_F \leq \sqrt{K}\delta \leq \gamma/2$ . ■

Now we are ready to prove Lemma 1.2.

**Proof:** The first case is for the first step of the algorithm, when we try to find the farthest point to the origin. Here essentially  $S = \{\vec{0}\}$ . For any two vertices  $v_1, v_2$ , since the simplex is  $\gamma$  robust, the distance between  $v_1$  and  $v_2$  is at least  $\gamma$ . Which means  $\text{dis}(\vec{0}, v_1) + \text{dis}(\vec{0}, v_2) \geq \gamma$ , one of them must be at least  $\gamma/2$ .

For the later steps, recall that  $S$  contains vertices of a perturbed simplex. Let  $S'$  be the set of original vertices corresponding to the perturbed vertices in  $S$ . Let  $v$  be any vertex in  $\{v_1, v_2, \dots, v_K\}$  which is not in  $S$ . Now we know the distance between  $v$  and  $S$  is equal to  $\text{vol}(S \cup \{v\}) / (|S| - 1)\text{vol}(S)$ . On the other hand, we know  $\text{vol}(S' \cup \{v\}) / (|S'| - 1)\text{vol}(S') \geq \gamma$ . Using Lemma 1.3 to bound the ratio between the two pairs  $\text{vol}(S)/\text{vol}(S')$  and  $\text{vol}(S \cup \{v\})/\text{vol}(S' \cup \{v\})$ , we get

$$\text{dis}(v, S) \geq (1 - 4\epsilon'/\gamma)^{2|S|-2}\gamma > \gamma/2$$

when  $\gamma > 20K\epsilon'$ .

■

Lemma 1.1 is based on the following observation: in a simplex the point with largest  $\ell_2$  is always a vertex. Even if two vertices have the same norm if they are not close to each other the vertices on the edge connecting them will have significantly lower norm.

**Proof:** (Lemma 1.1)

Since  $d_j$  is the point found by the algorithm, let us consider the point  $a_j$  before perturbation. The point  $a_j$  is inside the simplex, therefore we can write  $a_j$  as a convex combination of the vertices:

$$a_j = \sum_{t=1}^K c_t v_t$$

Let  $v_t$  be the vertex with largest coefficient  $c_t$ . Let  $\Delta$  be the largest distance from some vertex to the space spanned by points in  $S$  ( $\Delta = \max_l \text{dis}(v_l, \text{span}(S))$ ). By Lemma 1.2 we know  $\Delta > \gamma/2$ . Also notice that we are not assuming  $\text{dis}(v_t, \text{span}(S)) = \Delta$ .

Now we rewrite  $a_j$  as  $c_t v_t + (1 - c_t)w$ , where  $w$  is a vector in the convex hull of vertices other than  $v_t$ .

Observe that  $a_j$  must be far from  $\text{span}(S)$ , because  $d_j$  is the farthest point found by the algorithm. Indeed

$$\begin{aligned} \text{dis}(a_j, \text{span}(S)) &\geq \text{dis}(d_j, \text{span}(S)) - \epsilon \\ &\geq \text{dis}(v_l, \text{span}(S)) - 2\epsilon \geq \Delta - 2\epsilon. \end{aligned}$$

The second inequality is because there must be some point  $d_l$  that correspond to the farthest vertex  $v_l$  and have  $\text{dis}(d_l, \text{span}(S)) \geq \Delta - \epsilon$ . Thus as  $d_j$  is the farthest point  $\text{dis}(d_j, \text{span}(S)) \geq \text{dis}(d_l, \text{span}(S)) \geq \Delta - \epsilon$ .

The point  $a_j$  is on the segment connecting  $v_t$  and  $w$ , the distance between  $a_j$  and  $\text{span}(S)$  is not much

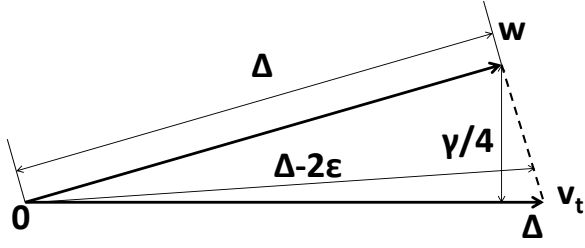

Figure 2. Proof of Lemma 1.1, after projecting to the orthogonal subspace of  $\text{span}(S)$ .

smaller than that of  $v_t$  and  $w$ . Following the intuition in  $\ell_2$  norm when  $v_t$  and  $w$  are far we would expect  $a_j$  to be very close to either  $v_t$  or  $w$ . Since  $c_t \geq 1/K$  it cannot be really close to  $w$ , so it must be really close to  $v_t$ . We formalize this intuition by the following calculation (see Figure 2):

Project everything to the orthogonal subspace of  $\text{span}(S)$  (points in  $\text{span}(S)$  are now at the origin). After projection distance to  $\text{span}(S)$  is just the  $\ell_2$  norm of a vector. Without loss of generality we assume  $\|v_t\|_2 = \|w\|_2 = \Delta$  because these two have length at most  $\Delta$ , and extending these two vectors to have length  $\Delta$  can only increase the length of  $d_j$ .

The point  $v_t$  must be far from  $w$  by applying Lemma 1.2: consider the set of vertices  $V' = \{v_i : v_i \text{ does not correspond to any point in } S \text{ and } i \neq t\}$ . The set  $V' \cup S$  satisfy the assumptions in Lemma 1.2 so there must be one vertex that is far from  $\text{span}(V' \cup S)$ , and it can only be  $v_t$ . Therefore even after projecting to orthogonal subspace of  $\text{span}(S)$ ,  $v_t$  is still far from any convex combination of  $V'$ . The vertices that are not in  $V'$  all have very small norm after projecting to orthogonal subspace (at most  $\delta_0$ ) so we know the distance of  $v_t$  and  $w$  is at least  $\gamma/2 - \delta_0 > \gamma/4$ .

Now the problem becomes a two dimensional calculation. When  $c_t$  is fixed the length of  $a_j$  is strictly increasing when the distance of  $v_t$  and  $w$  decrease, so we assume the distance is  $\gamma/4$ . Simple calculation (using essentially just pythagorean theorem) shows

$$c_t(1 - c_t) \leq \frac{\epsilon}{\Delta - \sqrt{\Delta^2 - \gamma^2/16}}.$$

The right hand side is largest when  $\Delta = 2$  (since the vectors are in unit ball) and the maximum value is  $O(\epsilon/\gamma^2)$ . When this value is smaller than  $1/K$ , we must have  $1 - c_t \leq O(\epsilon/\gamma^2)$ . Thus  $c_t \geq 1 - O(\epsilon/\gamma^2)$  and  $\delta \leq (1 - c_t) + \epsilon \leq O(\epsilon/\gamma^2)$ . ■

The cleanup phase tries to find the farthest point to a subset of  $K - 1$  vertices, and use that point as the  $K$ -th vertex. This will improve the result because when we have  $K - 1$  points close to  $K - 1$  vertices, only one of the vertices can be far from their span. Therefore the farthest point must be close to the only remaining vertex. Another way of viewing this is that the algorithm is trying to greedily maximize the volume of the simplex, which makes sense because the larger the volume is, the more words/documents the final LDA model can explain.

The following lemma makes the intuitions rigorous and shows how cleanup improves the guarantee of Lemma 1.1.

**Lemma 1.5.** *Suppose  $|S| = K - 1$  and each point in  $S$  is  $\delta = O(\epsilon/\gamma^2) < \gamma/20K$  close to distinct vertices  $v_i$ 's, the farthest point found by the algorithm is  $d_j$ , then the corresponding  $a_j$   $O(\epsilon/\gamma)$ -covers the remaining vertex.*

**Proof:** We still look at the original point  $a_j$  and express it as  $\sum_{t=1}^K c_t v_t$ . Without loss of generality let  $v_1$  be the vertex that does not correspond to anything in  $S$ . By Lemma 1.2  $v_1$  is  $\gamma/2$  far from  $\text{span}(S)$ . On the other hand all other vertices are at least  $\gamma/20r$  close to  $\text{span}(S)$ . We know the distance  $\text{dis}(a_j, \text{span}(S)) \geq \text{dis}(v_1, \text{span}(S)) - 2\epsilon$ , this cannot be true unless  $c_1 \geq 1 - O(\epsilon/\gamma)$ . ■

These lemmas directly lead to the following theorem:

**Theorem 1.6.** *FastAnchorWords algorithm runs in time  $\tilde{O}(V^2 + VK/\epsilon^2)$  and outputs a subset of  $\{d_1, \dots, d_V\}$  of size  $K$  that  $O(\epsilon/\gamma)$ -covers the vertices provided that  $20K\epsilon/\gamma^2 < \gamma$ .*

**Proof:** In the first phase of the algorithm, do induction using Lemma 1.1. When  $20K\epsilon/\gamma^2 < \gamma$  Lemma 1.1 shows that we find a set of points that  $O(\epsilon/\gamma^2)$ -covers the vertices. Now Lemma 1.5 shows after cleanup phase the points are refined to  $O(\epsilon/\gamma)$ -cover the vertices. ■

## 2. Proof for Nonnegative Recover Procedure

In order to show RecoverL2 learns the parameters even when the rows of  $\tilde{Q}$  are perturbed, we need the following lemma that shows when columns of  $\tilde{Q}$  are close to the expectation, the posteriors  $c$  computed by the algorithm is also close to the true value.

**Lemma 2.1.** *For a  $\gamma$  robust simplex  $S$  with vertices  $\{v_1, v_2, \dots, v_K\}$ , let  $v$  be a point in the simplex that can be represented as a convex combination  $v = \sum_{i=1}^K c_i v_i$ . If the vertices of  $S$  are perturbed to  $S' = \{\dots, v'_i, \dots\}$*

where  $\|v'_i - v_i\| \leq \delta_1$  and  $v$  is perturbed to  $v'$  where  $\|v - v'\| \leq \delta_2$ . Let  $v^*$  be the point in  $\text{conv}\{S'\}$  that is closest to  $v'$ , and  $v^* = \sum_{i=1}^K c'_i v_i$ , when  $10\sqrt{K}\delta_1 \leq \gamma$  for all  $i \in [K]$   $|c_i - c'_i| \leq 4(\delta_1 + \delta_2)/\gamma$ .

**Proof:** Consider the point  $u = \sum_{i=1}^K c_i v'_i$ , by triangle inequality:  $\|u - v\| \leq \sum_{i=1}^K c_i \|v_i - v'_i\| \leq \delta_1$ . Hence  $\|u - v'\| \leq \|u - v\| + \|v - v'\| \leq \delta_1 + \delta_2$ , and  $u$  is in  $S'$ . The point  $v^*$  is the point in  $\text{conv}\{S'\}$  that is closest to  $v'$ , so  $\|v^* - v'\| \leq \delta_1 + \delta_2$  and  $\|v^* - u\| \leq 2(\delta_1 + \delta_2)$ .

Then we need to show when a point ( $u$ ) moves a small distance, its representation also changes by a small amount. Intuitively this is true because  $S$  is  $\gamma$  robust. By Lemma 1.2 when  $10\sqrt{K}\delta_1 < \gamma$ , the simplex  $S'$  is also  $\gamma/2$  robust. For any  $i$ , let  $\text{Proj}_i(v^*)$  and  $\text{Proj}_i(u)$  be the projections of  $v^*$  and  $u$  in the orthogonal subspace of  $\text{span}(S' \setminus v'_i)$ , then

$$\begin{aligned} |c_i - c'_i| &= \|\text{Proj}_i(v^*) - \text{Proj}_i(u)\| / \text{dis}(v_i, \text{span}(S' \setminus v'_i)) \\ &\leq 4(\delta_1 + \delta_2)/\gamma \end{aligned}$$

and this completes the proof. ■

With this lemma it is not hard to show that RecoverL2 has polynomial sample complexity.

**Theorem 2.2.** *When the number of documents  $M$  is at least*

$$\max\{O(aK^3 \log V/D(\gamma p)^6 \epsilon), O((aK)^3 \log V/D\epsilon^3(\gamma p)^4)\}$$

*our algorithm using the conjunction of FastAnchorWords and RecoverL2 learns the  $A$  matrix with entry-wise error at most  $\epsilon$ .*

**Proof:** (sketch) We can assume without loss of generality that each word occurs with probability at least  $\epsilon/4aK$  and furthermore that if  $M$  is at least  $50 \log V/D\epsilon_Q^2$  then the empirical matrix  $\tilde{Q}$  is entry-wise within an additive  $\epsilon_Q$  to the true  $Q = \frac{1}{M} \sum_{d=1}^M A W_d W_d^T A^T$  see (Arora et al., 2012) for the details. Also, the  $K$  anchor rows of  $\tilde{Q}$  form a simplex that is  $\gamma p$  robust.

The error in each column of  $\tilde{Q}$  can be at most  $\delta_2 = \epsilon_Q \sqrt{4aK}/\epsilon$ . By Theorem 1.6 when  $20K\delta_2/(\gamma p)^2 < \gamma p$  (which is satisfied when  $M = O(aK^3 \log V/D(\gamma p)^6 \epsilon)$ ), the anchor words found are  $\delta_1 = O(\delta_2/(\gamma p))$  close to the true anchor words. Hence by Lemma 2.1 every entry of  $C$  has error at most  $O(\delta_2/(\gamma p)^2)$ .

With such number of documents, all the word probabilities  $p(w = i)$  are estimated more accurately than the entries of  $C_{i,j}$ , so we omit their perturbations here for simplicity. When we apply the Bayes rule, we know  $A_{i,k} = C_{i,k} p(w = i)/p(z = k)$ , where

$p(z = k)$  is  $\alpha_k$  which is lower bounded by  $1/aK$ . The numerator and denominator are all related to entries of  $C$  with positive coefficients sum up to at most 1. Therefore the errors  $\delta_{num}$  and  $\delta_{denom}$  are at most the error of a single entry of  $C$ , which is bounded by  $O(\delta_2/(\gamma p)^2)$ . Applying Taylor's Expansion to  $(p(z = k, w = i) + \delta_{num})/(\alpha_k + \delta_{denom})$ , the error on entries of  $A$  is at most  $O(aK\delta_2/(\gamma p)^2)$ . When  $\epsilon_Q \leq O((\gamma p)^2 \epsilon^{1.5}/(aK)^{1.5})$ , we have  $O(aK\delta_2/(\gamma p)^2) \leq \epsilon$ , and get the desired accuracy of  $A$ . The number of document required is  $M = O((aK)^3 \log V/D\epsilon^3(\gamma p)^4)$ .

The sample complexity for  $R$  can then be bounded using matrix perturbation theory. ■

For RecoverKL, we observe that the dimension and minimum values of  $v_i$ 's are all bounded by polynomials of  $\epsilon$ ,  $a$ ,  $r$  (see Section 3.5 Reducing Dictionary Size of (Arora et al., 2012)). In this case, when distance  $\delta$  is small enough, we know the KL-divergence is both upper and lowerbounded by some polynomial factor times  $\ell_2$  norm squared.

**Lemma 2.3.** *When all values in the vectors  $\{v'_i\}$  are at least  $l = \epsilon^2/20a^2r^2$ , if  $u$  is one of  $v'_i$ , and  $v$  is in the convex hull of perturbed vertices  $\{v'_1, v'_2, \dots, v'_K\}$ ,  $\|u - v\| \leq \epsilon^2/100a^2r^2$ , then  $D_{KL}(u\|v) \leq 2\|u - v\|^2/l$ .*

**Proof:** Let  $s_i = u_i - v_i$ , apply Taylor's expansion on  $\log(v_i + s_i)/v_i$ , we know in the range of parameters  $s_i + s_i^2/2v_i \leq \log(v_i + s_i)/v_i \leq s_i + 2s_i^2/v_i$ .

Adding this up, using the fact  $\sum s_i = \sum u_i - \sum v_i = 0$ , we know the KL-divergence is bounded by

$$D_{KL}(u\|v) \leq 2 \sum s_i^2/v_i \leq 2\|u - v\|^2/l.$$

■

On the other hand, by Pinsker's inequality, we know  $D_{KL}(u\|v) \geq 2\|u - v\|_1^2 \geq 2\|u - v\|^2$ .

Using these two bounds we can easily prove a replacement for Lemma 2.1.

**Lemma 2.4.** *For a  $\gamma$  robust simplex  $S$  with vertices  $\{v_1, v_2, \dots, v_K\}$ , let  $v$  be a point in the simplex that can be represented as a convex combination  $v = \sum_{i=1}^K c_i v_i$ . If the vertices of  $S$  are perturbed to  $S' = \{\dots, v'_i, \dots\}$  where  $\|v'_i - v_i\| \leq \delta_1$  and  $v$  is perturbed to  $v'$  where  $\|v - v'\| \leq \delta_2$ . Further assume all entries of  $v'$  and  $v'_i$  are at least  $l = \epsilon^2/20a^2r^2$ . Let  $v^{KL}$  be the point in  $\text{conv}\{S'\}$  that has smallest  $D_{KL}(v'\|v^{KL})$ , and  $v^{KL} = \sum_{i=1}^K c'_i v_i$ , when  $10\sqrt{K}\delta_1 \leq \gamma$ ,  $(\delta_1 + \delta_2) < l/5$ , for all  $i \in [K]$   $|c_i - c'_i| \leq 4(\delta_1 + \delta_2)/\gamma\sqrt{l}$ .*

**Proof:** Let  $v^*$  be the closest point (in  $\ell_2$  distance) of  $v'$  in  $\text{conv}\{S'\}$ . By proof of Lemma 2.1 we know  $\|v^* - v'\| \leq \delta_1 + \delta_2$ . Hence by Lemma 2.3  $D_{KL}(v'\|v^*) \leq 2(\delta_1 + \delta_2)^2/l$ .

Since  $v^{KL}$  is the point with smallest divergence, we know in particular  $D_{KL}(v'\|v^{KL}) \leq 2(\delta_1 + \delta_2)^2/l$ . On the other hand, by Pinsker's inequality  $D_{KL}(v'\|v^{KL}) \geq 2\|v' - v^{KL}\|^2$ , therefore we know  $\|v' - v^{KL}\| \leq (\delta_1 + \delta_2)/\sqrt{l}$ .

Now we follow the proof of Lemma 2.1 and define  $u = \sum_{i=1}^K c_i v'_i$ , then we know  $\|u - v^{KL}\| \leq \|u - v'\| + \|v' - v^{KL}\| \leq 2(\delta_1 + \delta_2)/\sqrt{l}$ , and similar to Lemma 2.1 we know  $|c_i - c'_i| \leq 4(\delta_1 + \delta_2)/\gamma\sqrt{l}$ . ■

We can simply replace Lemma 2.1 with this Lemma and get provable guarantee of RecoverKL. However, the argument here is not tight (in particular it gives worse bound than  $\ell_2$ ).

### 3. Empirical Results

This section contains plots for  $\ell_1$ , held-out probability, coherence, and uniqueness for all semi-synthetic data sets. Up is better for all metrics except  $\ell_1$  error. The advantage of the non-negative recovery methods over the original Recover method on the real data is consistent with the results observed on the semi-synthetic data. For example, one can compare the mean log likelihood on real NY Times data from Figure 5 of the main paper (100 topics; 236k docs) with the semi-synthetic NY Times data shown in Figure 3 of the supplementary materials (100 topics; 250k docs). The values for the real data are [Recover: -8.42, RecoverL2: -8.16, RecoverKL: -8.09, Gibbs -7.93] and for semi-synthetic are [Recover: -8.23, RecoverL2: -8.08, RecoverKL: -8.08, Gibbs: -8.076].

#### 3.1. Sample Topics

Tables 1, 2, and 3 show 100 topics trained on real NY Times articles using the RecoverL2 algorithm. Each topic is followed by the most similar topic (measured by  $\ell_1$  distance) from a model trained on the same documents with Gibbs sampling. When the anchor word is among the top six words by probability it is highlighted in bold. Note that the anchor word is frequently not the most prominent word.

## 4. Algorithmic Details

### 4.1. Generating $Q$ matrix

For each document, let  $H_d$  be the vector in  $\mathbb{R}^V$  such that the  $i$ -th entry is the number of times word  $i$  ap-

Table 1. Example topic pairs from NY Times sorted by  $\ell_1$  distance, anchor words in bold.

|           |                                                                                                           |
|-----------|-----------------------------------------------------------------------------------------------------------|
| RecoverL2 | run inning game hit season <b>z</b> zz_anaheim_angel                                                      |
| Gibbs     | run inning hit game ball pitch                                                                            |
| RecoverL2 | king goal game team games season                                                                          |
| Gibbs     | point game team play season games                                                                         |
| RecoverL2 | yard game play season team touchdown                                                                      |
| Gibbs     | yard game season team play quarterback                                                                    |
| RecoverL2 | point game team season games play                                                                         |
| Gibbs     | point game team play season games                                                                         |
| RecoverL2 | zzz_laker point <b>z</b> zz_kobe_bryant zzz_o_neal game team                                              |
| Gibbs     | point game team play season games                                                                         |
| RecoverL2 | point game team season player <b>z</b> zz_clipper                                                         |
| Gibbs     | point game team season play zzz_usc                                                                       |
| RecoverL2 | ballot election court votes vote zzz_al_gore                                                              |
| Gibbs     | election ballot <b>z</b> zz_florida zzz_al_gore votes vote                                                |
| RecoverL2 | game zzz_usc team play point season                                                                       |
| Gibbs     | point game team season play zzz_usc                                                                       |
| RecoverL2 | company billion companies percent million stock                                                           |
| Gibbs     | company million percent billion analyst deal                                                              |
| RecoverL2 | car race team season driver point                                                                         |
| Gibbs     | race car driver racing zzz_nascar team                                                                    |
| RecoverL2 | zzz_dodger season run inning right game                                                                   |
| Gibbs     | season team baseball game player yankees                                                                  |
| RecoverL2 | palestinian zzz_israeli zzz_israel official attack                                                        |
| Gibbs     | <b>z</b> zz_palestinian<br>palestinian zzz_israeli zzz_israel attack zzz_palestinian<br>zzz_yasser_arafat |
| RecoverL2 | zzz_tiger_wood shot round player par play                                                                 |
| Gibbs     | zzz_tiger_wood shot golf tour round player                                                                |
| RecoverL2 | percent stock market companies fund quarter                                                               |
| Gibbs     | percent economy market stock economic growth                                                              |
| RecoverL2 | zzz_al_gore <b>z</b> zz_bill_bradley campaign president                                                   |
| Gibbs     | zzz_george_bush vice<br>zzz_al_gore zzz_george_bush campaign presidential republican zzz_john_mccain      |
| RecoverL2 | zzz_george_bush <b>z</b> zz_john_mccain campaign republican                                               |
| Gibbs     | zzz_al_gore zzz_george_bush campaign presidential republican zzz_john_mccain                              |
| RecoverL2 | net team season point player <b>z</b> zz_jason_kidd                                                       |
| Gibbs     | point game team play season games                                                                         |
| RecoverL2 | yankees run team season inning hit                                                                        |
| Gibbs     | season team baseball game player yankees                                                                  |
| RecoverL2 | zzz_al_gore zzz_george_bush percent president campaign zzz_bush                                           |
| Gibbs     | zzz_al_gore zzz_george_bush campaign presidential republican zzz_john_mccain                              |
| RecoverL2 | zzz_enron company firm <b>z</b> zz_arthur_andersen companies lawyer                                       |
| Gibbs     | zzz_enron company firm accounting<br>zzz_arthur_andersen financial                                        |
| RecoverL2 | team play game yard season player                                                                         |
| Gibbs     | yard game season team play quarterback                                                                    |
| RecoverL2 | film movie show director play character                                                                   |
| Gibbs     | film movie character play minutes hour                                                                    |
| RecoverL2 | zzz_taliban zzz_afghanistan official zzz_u_s government military                                          |
| Gibbs     | zzz_taliban zzz_afghanistan zzz_pakistan afghan<br>zzz_india government                                   |
| RecoverL2 | palestinian zzz_israel israeli peace zzz_yasser_arafat leader                                             |
| Gibbs     | palestinian zzz_israel peace israeli zzz_yasser_arafat leader                                             |
| RecoverL2 | point team game shot play zzz_celtic                                                                      |
| Gibbs     | point game team play season games                                                                         |
| RecoverL2 | zzz_bush <b>z</b> zz_mccain campaign republican tax                                                       |
| Gibbs     | zzz_republican<br>zzz_al_gore zzz_george_bush campaign presidential republican zzz_john_mccain            |
| RecoverL2 | zzz_met run team game hit season                                                                          |
| Gibbs     | season team baseball game player yankees                                                                  |
| RecoverL2 | team game season play games win                                                                           |
| Gibbs     | team coach game player season football                                                                    |
| RecoverL2 | government war <b>z</b> zz_slobodan_milosevic official court president                                    |
| Gibbs     | government war country rebel leader military                                                              |
| RecoverL2 | game set player <b>z</b> zz_pete_sampras play won                                                         |
| Gibbs     | player game match team soccer play                                                                        |
| RecoverL2 | zzz_al_gore campaign <b>z</b> zz_bradley president democratic zzz_clinton                                 |
| Gibbs     | zzz_al_gore zzz_george_bush campaign presidential republican zzz_john_mccain                              |
| RecoverL2 | team zzz_knick player season point play                                                                   |
| Gibbs     | point game team play season games                                                                         |
| RecoverL2 | com web www information sport question                                                                    |
| Gibbs     | palm beach com statesman daily american                                                                   |

Table 2. Example topic pairs from NY Times sorted by  $\ell_1$  distance, anchor words in bold.

|           |                                                                                                       |
|-----------|-------------------------------------------------------------------------------------------------------|
| RecoverL2 | season team game coach play school                                                                    |
| Gibbs     | team coach game player season football                                                                |
| RecoverL2 | air shower rain wind storm front                                                                      |
| Gibbs     | water fish weather storm wind air                                                                     |
| RecoverL2 | book film <b>beginitalic</b> enditalic look movie                                                     |
| Gibbs     | film movie character play minutes hour                                                                |
| RecoverL2 | zzz_al_gore campaign election zzz_george_bush                                                         |
| Gibbs     | zzz_florida president<br>zzz_al_gore zzz_george_bush campaign presidential republican zzz_john_mccain |
| RecoverL2 | race won horse <b>zzz_kentucky_derby</b> win winner                                                   |
| Gibbs     | horse race horses winner won zzz_kentucky_derby                                                       |
| RecoverL2 | company companies <b>zzz_at</b> percent business stock                                                |
| Gibbs     | company companies business industry firm market                                                       |
| RecoverL2 | company million companies percent business customer                                                   |
| Gibbs     | company companies business industry firm market                                                       |
| RecoverL2 | team coach season player jet job                                                                      |
| Gibbs     | team player million season contract agent                                                             |
| RecoverL2 | season team game play player zzz_cowboy                                                               |
| Gibbs     | yard game season team play quarterback                                                                |
| RecoverL2 | zzz_pakistan zzz_india official group attack                                                          |
| Gibbs     | zzz_united_states<br>zzz_taliban zzz_afghanistan zzz_pakistan afghan zzz_india government             |
| RecoverL2 | show network night television zzz_nbc program                                                         |
| Gibbs     | film movie character play minutes hour                                                                |
| RecoverL2 | com information question zzz_eastern commentary                                                       |
| Gibbs     | com question information zzz_eastern daily commentary                                                 |
| RecoverL2 | power plant company percent million energy                                                            |
| Gibbs     | oil power energy gas prices plant                                                                     |
| RecoverL2 | cell stem research zzz_bush human patient                                                             |
| Gibbs     | cell research human scientist stem genes                                                              |
| RecoverL2 | <b>zzz_governor_bush</b> zzz_al_gore campaign tax president plan                                      |
| Gibbs     | zzz_al_gore zzz_george_bush campaign presidential republican zzz_john_mccain                          |
| RecoverL2 | cup minutes add tablespoon water oil                                                                  |
| Gibbs     | cup minutes add tablespoon teaspoon oil                                                               |
| RecoverL2 | family home book right com children                                                                   |
| Gibbs     | film movie character play minutes hour                                                                |
| RecoverL2 | zzz_china chinese zzz_united_states <b>zzz_taiwan</b> official government                             |
| Gibbs     | zzz_china chinese zzz_beijing zzz_taiwan government official                                          |
| RecoverL2 | death court law case lawyer zzz_texas                                                                 |
| Gibbs     | trial death prison case lawyer prosecutor                                                             |
| RecoverL2 | company percent million sales business companies                                                      |
| Gibbs     | company companies business industry firm market                                                       |
| RecoverL2 | dog jump show quick brown <b>fox</b>                                                                  |
| Gibbs     | film movie character play minutes hour                                                                |
| RecoverL2 | <b>shark</b> play team attack water game                                                              |
| Gibbs     | film movie character play minutes hour                                                                |
| RecoverL2 | anthrax official mail letter worker attack                                                            |
| Gibbs     | anthrax official letter mail nuclear chemical                                                         |
| RecoverL2 | president zzz_clinton zzz_white_house zzz_bush official                                               |
| Gibbs     | zzz_bill_clinton<br>zzz_bush zzz_george_bush president administration zzz_white_house zzz_dick_cheney |
| RecoverL2 | father family <b>zzz_elian</b> boy court zzz_miami                                                    |
| Gibbs     | zzz_cuba zzz_miami cuban zzz_elian boy protest                                                        |
| RecoverL2 | oil prices percent million market zzz_united_states                                                   |
| Gibbs     | oil power energy gas prices plant                                                                     |
| RecoverL2 | <b>zzz_microsoft</b> company computer system window software                                          |
| Gibbs     | zzz_microsoft company companies cable zzz_at zzz_internet                                             |
| RecoverL2 | government election zzz_mexico political                                                              |
| Gibbs     | zzz_vicente_fox president<br>election political campaign zzz_party democratic voter                   |
| RecoverL2 | fight <b>zzz_mike_tyson</b> round right million champion                                              |
| Gibbs     | fight zzz_mike_tyson ring fighter champion round                                                      |
| RecoverL2 | right law president zzz_george_bush zzz_senate                                                        |
| Gibbs     | <b>zzz_john_ashcroft</b><br>election political campaign zzz_party democratic voter                    |
| RecoverL2 | com home look found show www                                                                          |
| Gibbs     | film movie character play minutes hour                                                                |
| RecoverL2 | car driver race <b>zzz_dale_earnhardt</b> racing                                                      |
| Gibbs     | zzz_nascar<br>night hour room hand told morning                                                       |
| RecoverL2 | book women family called author woman                                                                 |
| Gibbs     | film movie character play minutes hour                                                                |

Table 3. Example topic pairs from NY Times sorted by  $\ell_1$  distance, anchor words in bold.

|           |                                                                                  |
|-----------|----------------------------------------------------------------------------------|
| RecoverL2 | tax bill zzz_senate billion plan zzz_bush                                        |
| Gibbs     | bill zzz_senate zzz_congress zzz_house legislation zzz_white_house               |
| RecoverL2 | company <b>francisco</b> san com food home                                       |
| Gibbs     | palm beach com statesman daily american                                          |
| RecoverL2 | team player season game <b>zzz_john_rocke</b> r right                            |
| Gibbs     | season team baseball game player yankees                                         |
| RecoverL2 | zzz_bush official zzz_united_states zzz_u_s president                            |
| Gibbs     | zzz_north_korea<br>zzz_united_states weapon zzz_iraq nuclear zzz_russia zzz_bush |
| RecoverL2 | zzz_russian zzz_russia official military war attack                              |
| Gibbs     | government war country rebel leader military                                     |
| RecoverL2 | wine <b>wines</b> percent zzz_new_york com show                                  |
| Gibbs     | film movie character play minutes hour                                           |
| RecoverL2 | police <b>zzz_ray_lewis</b> player team case told                                |
| Gibbs     | police officer gun crime shooting shot                                           |
| RecoverL2 | government group political tax leader money                                      |
| Gibbs     | government war country rebel leader military                                     |
| RecoverL2 | percent company million airline flight deal                                      |
| Gibbs     | flight airport passenger airline security airlines                               |
| RecoverL2 | book ages children school boy web                                                |
| Gibbs     | book author writer word writing read                                             |
| RecoverL2 | <b>corp</b> group president energy company member                                |
| Gibbs     | palm beach com statesman daily american                                          |
| RecoverL2 | team tour <b>zzz_lance_armstrong</b> won race win                                |
| Gibbs     | zzz_olympic games medal gold team sport                                          |
| RecoverL2 | priest church official abuse bishop sexual                                       |
| Gibbs     | church religious priest zzz_god religion bishop                                  |
| RecoverL2 | human drug company companies million scientist                                   |
| Gibbs     | scientist light science planet called space                                      |
| RecoverL2 | music <b>zzz_napster</b> company song com web                                    |
| Gibbs     | palm beach com statesman daily american                                          |
| RecoverL2 | death government case federal official                                           |
| Gibbs     | <b>zzz_timothy_mcveigh</b><br>trial death prison case lawyer prosecutor          |
| RecoverL2 | million shares offering public company initial                                   |
| Gibbs     | company million percent billion analyst deal                                     |
| RecoverL2 | buy <b>panelist</b> thought flavor product ounces                                |
| Gibbs     | food restaurant chef dinner eat meal                                             |
| RecoverL2 | school student program teacher public children                                   |
| Gibbs     | school student teacher children test education                                   |
| RecoverL2 | security official government airport federal bill                                |
| Gibbs     | flight airport passenger airline security airlines                               |
| RecoverL2 | company member credit card money mean                                            |
| Gibbs     | zzz_enron company firm accounting zzz_arthur_andersen financial                  |
| RecoverL2 | million percent bond tax debt bill                                               |
| Gibbs     | million program billion money government federal                                 |
| RecoverL2 | million company zzz_new_york business art percent                                |
| Gibbs     | art artist painting museum show collection                                       |
| RecoverL2 | percent million number official group black                                      |
| Gibbs     | palm beach com statesman daily american                                          |
| RecoverL2 | company tires million car zzz_ford percent                                       |
| Gibbs     | company companies business industry firm market                                  |
| RecoverL2 | article zzz_new_york <b>misstated</b> company percent com                        |
| Gibbs     | palm beach com statesman daily american                                          |
| RecoverL2 | company million percent companies government official                            |
| Gibbs     | company companies business industry firm market                                  |
| RecoverL2 | official million train car system plan                                           |
| Gibbs     | million program billion money government federal                                 |
| RecoverL2 | <b>test</b> student school look percent system                                   |
| Gibbs     | patient doctor cancer medical hospital surgery                                   |
| RecoverL2 | con una mas dice las anos                                                        |
| Gibbs     | fax syndicate article com information con                                        |
| RecoverL2 | <b>por</b> con una mas millones como                                             |
| Gibbs     | fax syndicate article com information con                                        |
| RecoverL2 | las como <b>zzz_latin_trade</b> articulo telefono fax                            |
| Gibbs     | fax syndicate article com information con                                        |
| RecoverL2 | <b>los</b> con articulos telefono representantes                                 |
| Gibbs     | zzz_america_latina<br>fax syndicate article com information con                  |
| RecoverL2 | <b>file</b> sport read internet email zzz_los_angeles                            |
| Gibbs     | web site com www mail zzz_internet                                               |

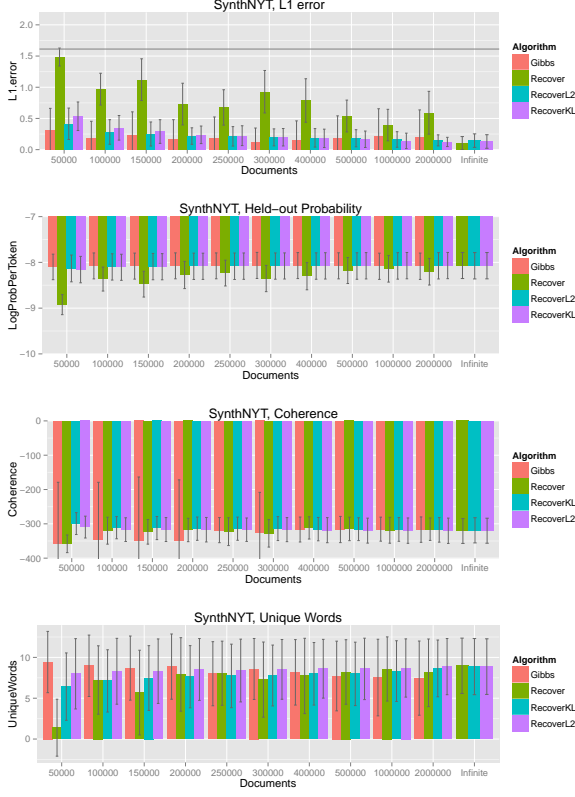

Figure 3. Results for a semi-synthetic model generated from a model trained on NY Times articles with  $K = 100$ .

pears in document  $d$ ,  $n_d$  be the length of the document and  $W_d$  be the topic vector chosen according to Dirichlet distribution when the documents are generated. Conditioned on  $W_d$ 's, our algorithms require the expectation of  $Q$  to be  $\frac{1}{M} \sum_{d=1}^M AW_d W_d^T A^T$ .

In order to achieve this, similar to (Anandkumar et al., 2012), let the normalized vector  $\tilde{H}_d = \frac{H_d}{\sqrt{n_d(n_d-1)}}$  and diagonal matrix  $\hat{H}_d = \frac{\text{Diag}(H_d)}{n_d(n_d-1)}$ . Compute the matrix

$$\tilde{H}_d \tilde{H}_d^T - \hat{H}_d = \frac{1}{n_d(n_d-1)} \sum_{i \neq j, i, j \in [n_d]} e_{z_{d,i}} e_{z_{d,j}}^T.$$

Here  $z_{d,i}$  is the  $i$ -th word of document  $d$ , and  $e_i \in \mathbb{R}^V$  is the basis vector. From the generative model, the expectation of all terms  $e_{z_{d,i}} e_{z_{d,j}}^T$  are equal to  $AW_d W_d^T A^T$ , hence by linearity of expectation we know  $\mathbf{E}[\tilde{H}_d \tilde{H}_d^T - \hat{H}_d] = AW_d W_d^T A^T$ .

If we collect all the column vectors  $\tilde{H}_d$  to form a large sparse matrix  $\tilde{H}$ , and compute the sum of all  $\hat{H}_d$  to get the diagonal matrix  $\hat{H}$ , we know  $Q = \tilde{H} \tilde{H}^T - \hat{H}$  has the desired expectation. The running time of this step is  $O(MD^2)$  where  $D^2$  is the expectation of the

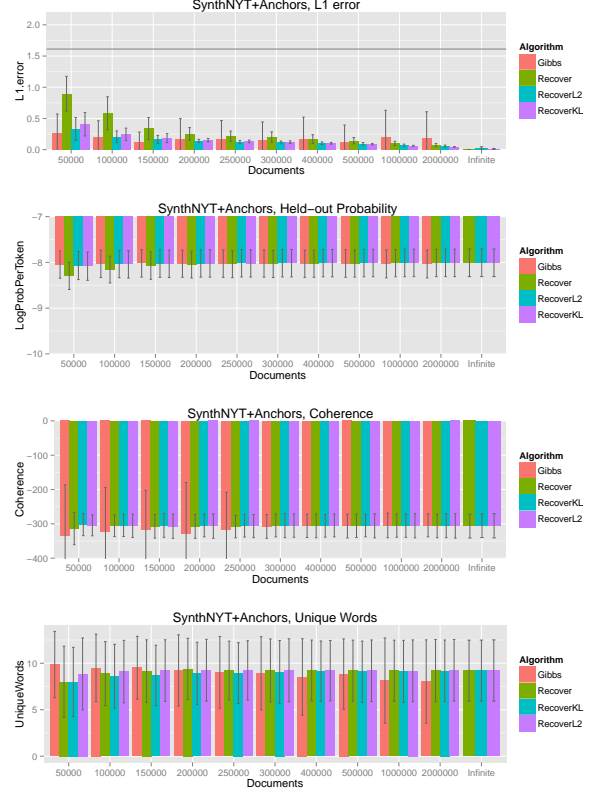

Figure 4. Results for a semi-synthetic model generated from a model trained on NY Times articles with  $K = 100$ , with a synthetic anchor word added to each topic.

length of the document squared.

## 4.2. Applying Recover to Small Datasets

The original Recover algorithm from Arora et al. (2012) can fail on small datasets if the  $Q_{S,S}$  matrix which holds the anchor-anchor co-occurrence counts is rank deficient due to sparsity. When Recover fails, we use a modified version of the algorithm, solving for  $\vec{z}$  by finding a least squares solution to  $Q_{S,S} \vec{z} = \vec{p}_S$  and solving for  $A^T$  with a pseudoinverse:  $A^T = (Q_{S,S} \text{Diag}(\vec{z}))^\dagger Q_S^T$ . This procedure can return an  $A$  matrix in which some columns contain all 0s. In that case we replace columns of 0s with a uniform distribution over the vocabulary words,  $\frac{1}{V} \mathbf{1}$ .

Negative values also often occur in the  $A$  matrix returned by the original Recover method. To project back onto the simplex, we clip all negative values to 0 and normalize the columns before evaluating the learned model.

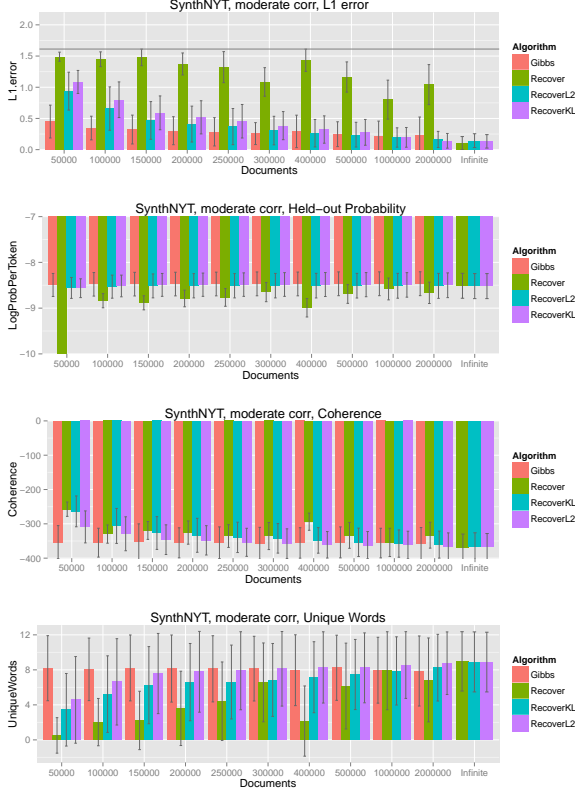

Figure 5. Results for a semi-synthetic model generated from a model trained on NY Times articles with  $K = 100$ , with moderate correlation between topics.

### 4.3. Exponentiated gradient algorithm

The optimization problem that arises in RecoverKL and RecoverL2 has the following form:

$$\begin{aligned} & \min_{\vec{x}} d(\bar{Q}_i^T, \bar{Q}_S \vec{x}) \\ & \text{subject to: } \vec{x} \geq 0 \text{ and } \sum_{i=1}^K x_i = 1, \end{aligned}$$

where  $d(\cdot, \cdot)$  is a Bregman divergence (in particular it is squared Euclidean distance for RecoverL2 and KL divergence for RecoverKL),  $\vec{x}$  is a column vector of size  $K$ ,  $\mathbf{S}$  is the set of  $K$  anchor indices,  $\bar{Q}_i$  is a row vector of size  $V$ , and  $\bar{Q}_S$  is the  $K \times V$  matrix formed by stacking the rows of  $\bar{Q}$  corresponding to the indices in  $\mathbf{S}$ .

This is a convex optimization problem with simplex constraints, which can be solved with the Exponentiated Gradient algorithm (Kivinen & Warmuth, 1995), described in Algorithm 1. The Exponentiated Gradient algorithm iteratively generates values of  $\vec{x}$  which are feasible and converge to the optimal value  $\vec{x}^*$ . In

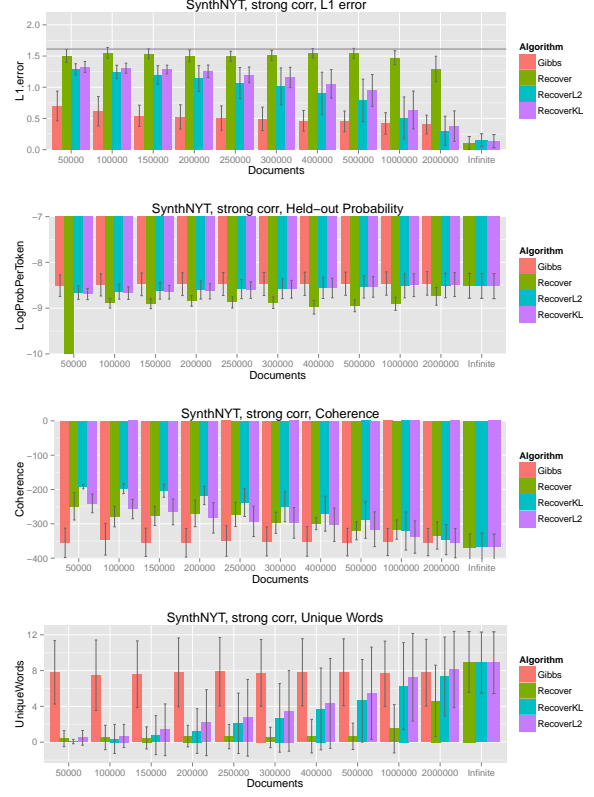

Figure 6. Results for a semi-synthetic model generated from a model trained on NY Times articles with  $K = 100$ , with stronger correlation between topics.

our experiments we show results using both squared Euclidean distance and KL divergence for the divergence measure.

To determine whether the algorithm has converged, we test whether the KKT conditions (which are sufficient for optimality in this problem) hold to within some tolerance,  $\epsilon$ . In our experiments  $\epsilon$  varies between  $10^{-6}$  and  $10^{-9}$  depending on the data set.

The KKT conditions for our constrained minimization problem are:

1. Stationarity:  $\nabla_{\vec{x}} d(\bar{Q}_i^T, \bar{Q}_S \vec{x}) - \vec{\lambda} + \mu \mathbf{1} = 0$ .
2. Primal Feasibility:  $\vec{x} \geq 0$ ,  $\sum_{i=1}^K x_i = 1$ .
3. Dual Feasibility:  $\lambda_i \geq 0$  for  $i \in \{1, 2, \dots, K\}$ .
4. Complementary Slackness:  $\lambda_i x_i = 0$  for  $i \in \{1, 2, \dots, K\}$ .

We define the following approximation to Condition 4:

- 4'.  $\epsilon$ -Complementary Slackness:  $0 \leq \vec{\lambda}^T \vec{x} < \epsilon$ .



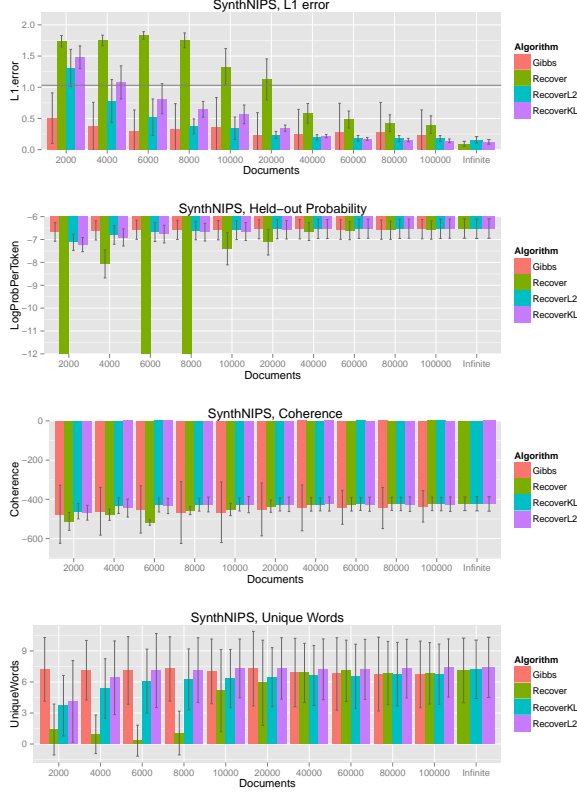

Figure 7. Results for a semi-synthetic model generated from a model trained on NIPS papers with  $K = 100$ . For  $D \in \{2000, 6000, 8000\}$ , Recover produces log probabilities of  $-\infty$  for some held-out documents.

Let  $\vec{x}_t$  be the  $t^{\text{th}}$  value generated by Exponentiated Gradient.  $\vec{x}_t$  is  $\epsilon$ -optimal if there exist  $\vec{\lambda}$  and  $\mu$  such that Conditions 1-3 and 4' are satisfied.

We initialize  $\vec{x}_0 = \frac{1}{K}\mathbf{1}$  and Exponentiated Gradient preserves primal feasibility, so  $\vec{x}_t$  satisfies Condition 2. The following  $\vec{\lambda}_t$  and  $\mu_t$  minimize  $\vec{\lambda}_t^T \vec{x}_t$  while satisfying conditions 1 and 3:

$$\begin{aligned} \mu_t &= -\min \left( \nabla_{\vec{x}} d(\vec{Q}_i^T, \vec{Q}_S \vec{x}) \Big|_{\vec{x}_t} \right) \\ \vec{\lambda}_t &= \nabla_{\vec{x}} d(\vec{Q}_i^T, \vec{Q}_S \vec{x}) \Big|_{\vec{x}_t} + \mu_t \mathbf{1}. \end{aligned}$$

The algorithm converges when Condition 4' is satisfied (i.e.  $\vec{\lambda}_t^T \vec{x}_t < \epsilon$ ).

$\vec{\lambda}_t^T \vec{x}_t$  can also be understood as the gap between an upper and lower bound on the objective. To see this, note that the Lagrangian function is:

$$L(\vec{x}, \vec{\lambda}, \mu) = d(\vec{Q}_i^T, \vec{Q}_S \vec{x}) - \vec{\lambda}^T \vec{x} + \mu(\vec{x}^T \mathbf{1} - 1),$$

The first term in the Lagrangian is exactly the primal objective, and  $(\vec{x}_t^T \mathbf{1} - 1)$  is zero at every iteration.

---

**Algorithm 1.** Exponentiated Gradient

**Input:** Matrix  $\vec{Q}_S$ , vector  $\vec{Q}_i^T$ , divergence measure  $d(\cdot, \cdot)$ , tolerance parameter  $\epsilon$

**Output:** non-negative normalized vector  $\vec{x}$  close to  $\vec{x}^*$ , the minimizer of  $d(\vec{Q}_i^T, \vec{Q}_S \vec{x})$

$$\vec{x}_0 \leftarrow \frac{1}{K} \mathbf{1}$$

$$t \leftarrow 0$$

Converged  $\leftarrow$  False

**while** not Converged **do**

$$t \leftarrow t + 1$$

$$\vec{g}_t = \nabla_{\vec{x}} d(\vec{Q}_i^T, \vec{Q}_S \vec{x}) \Big|_{\vec{x}_{t-1}}$$

Choose a step size  $\eta_t$

$$\vec{x}_t \leftarrow \vec{x}_{t-1} e^{-\eta_t \vec{g}_t} \text{ (Gradient step)}$$

$$\vec{x}_t \leftarrow \frac{\vec{x}_t}{|\vec{x}_t|_1} \text{ (Projection onto the simplex)}$$

$$\mu_t \leftarrow -\min \left( \nabla_{\vec{x}} d(\vec{Q}_i^T, \vec{Q}_S \vec{x}) \Big|_{\vec{x}_t} \right)$$

$$\vec{\lambda}_t \leftarrow \nabla_{\vec{x}} d(\vec{Q}_i^T, \vec{Q}_S \vec{x}) \Big|_{\vec{x}_t} + \mu_t \mathbf{1}$$

$$\text{Converged} \leftarrow \vec{\lambda}_t^T \vec{x}_t < \epsilon$$

**end while**

**return**  $x_t$

---

Since the Lagrangian lower bounds the objective,  $\vec{\lambda}_t^T \vec{x}_t$  is the value of the gap. Strong duality holds for this problem, so at optimality, this gap is 0. Testing that the gap is less than  $\epsilon$  is an approximate optimality test.

Stepsizes at each iteration are chosen with a line search to find an  $\eta_t$  that satisfies the Wolfe and Armijo conditions (For details, see [Nocedal & Wright \(2006\)](#)).

The running time of RecoverL2 is the time of solving  $V$  small ( $K \times K$ ) quadratic programs. When using Exponentiated Gradient to solve the quadratic program, each word requires  $O(KV)$  time for preprocessing and  $O(K^2)$  per iteration. The total running time is  $O(KV^2 + K^2VT)$  where  $T$  is the average number of iterations. The value of  $T$  is about 100 – 1000 depending on data sets.

## References

- Anandkumar, A., Foster, D., Hsu, D., Kakade, S., and Liu, Y. Two svds suffice: Spectral decompositions for probabilistic topic modeling and latent dirichlet allocation. In *NIPS*, 2012. [4.1](#)
- Arora, S., Ge, R., and Moitra, A. Learning topic models – going beyond svd. In *FOCS*, 2012. [2](#), [4.2](#)
- Kivinen, Jyrki and Warmuth, Manfred K. Exponentiated gradient versus gradient descent for linear predictors. *Inform. and Comput.*, 132, 1995. [4.3](#)
- Nocedal, J. and Wright, S. J. *Numerical Optimization*. Springer, New York, 2nd edition, 2006. [4.3](#)
- Wedin, P. Perturbation bounds in connection with singular value decomposition. *BIT Numerical Mathematics*, 12(1):99–111, 1972. [1](#)
